# Supplementary material
Source: Springer Nature journal article supplement (https://www.springermedizin.de/resource/supplementary/10194_2014_614_MOESM1_ESM.pdf/9423282)
Supplement: MOESM1 [file 9423282]

All Korean adults, aged 19-69 years

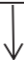

Clustered random sampling  
proportional to population distribution,  
with target population of 2,750

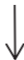

Approached 7,430 individuals

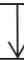

3,114 individuals  
accepted the survey

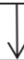

2,762 individuals  
completed the survey

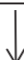

586 individuals with tension-type  
headache according to the standard criteria
